# Supplementary material for: Does Exercise Training Improve Cardiac-Parasympathetic Nervous System Activity in Sedentary People? A Systematic Review with Meta-Analysis
Source: MDPI journal article supplement (doi:10.3390/ijerph192113899), 2022-10-26
Supplement: s1 [file s1]

## ELECTRONIC SUPPLEMENTARY MATERIAL

**Section 1:** Electronic database search terms.

(2) Interventions:

#1 Exercise OR training OR HIIT OR MCT: Ti/ab

(3) #1 AND #2

(4) Outcomes:

#4. "heart rate variability" OR HRV OR "heart rate recovery" OR HRR OR parasympathetic OR vagal OR "autonomic function" OR "autonomic modulation" OR "autonomic tone": Ti/ab

(5) #3 AND #4

## Section 2: Tables.

**Table S1.** Criteria used to carry out methodological quality assessment.

| Item                 | Question                                          | Additional Information                                                                                                                                                                                                                                                                                                                                        | Scoring         |
|----------------------|---------------------------------------------------|---------------------------------------------------------------------------------------------------------------------------------------------------------------------------------------------------------------------------------------------------------------------------------------------------------------------------------------------------------------|-----------------|
| <b>Study Quality</b> |                                                   |                                                                                                                                                                                                                                                                                                                                                               |                 |
| 1                    | Eligibility criteria specified                    | Eligibility criteria should be specified and fulfilled, and specific diagnostic test values should be provided for all participants.                                                                                                                                                                                                                          | Yes (1) /No (0) |
| 2                    | Allocation concealment                            | It should be stated if group allocation was concealed; meaning if a patient was eligible for inclusion in the trial was unaware (when this decision was made) of which group the patient would be allocated to. Yes, if group allocation was concealed from patients eligible for inclusion in the trial (e.g. consent should be given before randomization). | Yes (1) /No (0) |
| 3                    | Randomization specified                           | A description of the method used to allocate patients into treatment groups should be provided. Yes, if methods are described and they are truly random e.g., coin-tossing, sequence of randomly generated numbers.                                                                                                                                           | Yes (1) /No (0) |
| 4                    | Groups similar at baseline                        | Baseline data of all participants who were randomized should be presented. There should be no significant difference in the measure of the severity of the treated condition between treatment groups. 1 Point – if baseline data are separated by group allocation, presented and no differences are apparent.                                               | Yes (1) /No (0) |
| 5                    | Blinding of assessor for at least one key outcome | It is not always possible to blind patients and/or therapists; however, blinding of assessors is reasonable. If assessors of primary outcome measures are blinded to the intervention allocation of the patients, this should be stated clearly.                                                                                                              | Yes (1) /No (0) |

**Table S1.** Continued.

| <b>Item</b> | <b>Question</b>                                                              | <b>Additional Information</b>                                                                                                                                                                                                                                                                                                                                                                                                                                                                                                                                        | <b>Scoring</b>  |
|-------------|------------------------------------------------------------------------------|----------------------------------------------------------------------------------------------------------------------------------------------------------------------------------------------------------------------------------------------------------------------------------------------------------------------------------------------------------------------------------------------------------------------------------------------------------------------------------------------------------------------------------------------------------------------|-----------------|
|             |                                                                              | <b>Study Reporting</b>                                                                                                                                                                                                                                                                                                                                                                                                                                                                                                                                               |                 |
| 6           | Assessment of outcome measures                                               | The percentage of patients completing the study in both groups should be reported. 1 Point if adherence >85%, 1 point if adverse events are reported and 1 point if exercise attendance is reported.                                                                                                                                                                                                                                                                                                                                                                 | Yes (3) /No (0) |
| 7           | Intention-to-treat analysis                                                  | When a patient withdraws, this analysis is conducted by using either the last value obtained for each of the outcome measures as a post-intervention value, or by using the baseline value as a post value. This analysis should be added to the data of those that did complete the study and an analysis conducted. 1 point for no withdrawal.                                                                                                                                                                                                                     | Yes (2) /No (0) |
| 8           | Between-group statistical comparisons reported                               | Comparison of exercise vs. comparator (control) group for the primary and at least one secondary outcome should be performed. 1 Point if between-group statistical comparisons are reported for the primary outcome measure of interest, 1-point if f between-group statistical comparisons are reported for at least one secondary outcome measure.                                                                                                                                                                                                                 | Yes (1) /No (0) |
| 9           | Point measures and measures of variability for all reported outcome measures | Point estimates should be provided for all outcomes, otherwise this could be deemed selective outcome reporting.                                                                                                                                                                                                                                                                                                                                                                                                                                                     | Yes (1) /No (0) |
| 10          | Activity monitoring in control groups                                        | Between-group differences may be diluted if control patient's crossover to intervention. As many as one third of patients do this, so some measure e.g., exercise diary or activity monitoring should be supplied so this effect can be measured and quantified. 1 point if control patients are asked to report their levels of physical activity and data are presented.                                                                                                                                                                                           | Yes (1) /No (0) |
| 11          | Relative exercise intensity remained constant                                | Exercise intensity is considered by many to be the best stimulus for adaptation. Once patients begin an exercise programme at a set intensity they will begin to adapt. Throughout the study duration the relative intensity will fall in those that do adapt. Therefore, periodic assessment of exercise capacity should be conducted, and the intensity titrated up (or in those that lose fitness, titrated down) so that exercise intensity remains constant. 1 point where attempt is made to keep relative intensity constant/ absolute intensity progressive. | Yes (1) /No (0) |
| 12          | Exercise volume and energy expenditure reported                              | Exercise parameters: session and programme duration, session frequency, exercise training intensity and modality should be clearly reported.                                                                                                                                                                                                                                                                                                                                                                                                                         | Yes (1) /No (0) |

**Table S2.** Intervention and resting heart rate variability assessment characteristics.

| Study<br>(author)          | Group;<br>exercise type<br>(aerobic<br>method) | Intervention characteristics        |                                                                                                                                                                                                                                                                                                                                                                                             | HRV assessment characteristics                         |                                                             |
|----------------------------|------------------------------------------------|-------------------------------------|---------------------------------------------------------------------------------------------------------------------------------------------------------------------------------------------------------------------------------------------------------------------------------------------------------------------------------------------------------------------------------------------|--------------------------------------------------------|-------------------------------------------------------------|
|                            |                                                | Setting; length;<br>sessions a week | Session details                                                                                                                                                                                                                                                                                                                                                                             | HRV index; power<br>spectral density method;<br>device | Setting; assessment<br>position; breathing<br>rate          |
| Audette et al. [65] *      | IG;<br>AT (MIT)<br><br>CG; NA                  | Supervised; 12<br>weeks; 3 sessions | 15 min WU (with flexibility) + 40 min walking at 50-70% HR peak (estimated) / Progression: 10 - 30 min 8 weeks / maintained 4 weeks + 5 min CD                                                                                                                                                                                                                                              | HF (ms <sup>2</sup> ); NR; ECG                         | Laboratory-based<br>measures; NR; NR                        |
| Boutcher et al. [66]       | IG;<br>AT (HIIT)<br><br>CG; NA                 | Supervised; 12<br>weeks; 3 sessions | 5 min WU + 20 min at 80 - 85% HR peak (continuous 8 s sprint cadence 100 and 130 rpm, 12 s recovery cadence 30 rpm) + 5 min CD                                                                                                                                                                                                                                                              | HF (ms <sup>2</sup> ); FFT; HR<br>monitor              | Laboratory-based<br>measures; supine;<br>spontaneous        |
| Lopes et al. [77]          | IG;<br>RT (NA)<br><br>CG; NA                   | Supervised; 12<br>weeks; 3 sessions | 10 min pedaling cycle ergometer / 5 min stretching WU + 8 exercises lower and upper body (Week 1, 1 set for exercise a 12-20 rep / Week 2, 3, 4 and 5, 2 sets for exercise 12-20 rep / Week 6, 3 sets for exercise and 12-20 rep. Week 7, 8, 9, 10 and 11, 2 sets for exercise and 12-20 rep / Week 12, 1 set for exercise and 12-20 rep / 50% at 1RM loading adjustments week 4, 7 and 10) | RMSSD; NA; ECG                                         | Laboratory-based<br>measures; supine;<br>12 breaths per min |
| Melanson and Freedson [78] | IG;<br>AT (MIT)<br><br>CG; NA                  | Supervised; 16<br>weeks; 3 sessions | 30 min (cycle) at 70-80% of HRres / cadence 80 rpm                                                                                                                                                                                                                                                                                                                                          | RMSSD and HF (ms <sup>2</sup> );<br>FFT; ECG           | Laboratory-based<br>measures; supine;<br>10 breaths per min |
| Mourot et al. [79]         | IG;<br>AT (HIIT)<br><br>CG; NA                 | NR; 6 weeks;<br>3 sessions          | 9 consecutive periods of 5 min including / 4 min “base” work W-VT (ventilatory threshold power output) + 1-min “peak” work W-M (maximal power output)                                                                                                                                                                                                                                       | RMSSD and HF (ms <sup>2</sup> );<br>CGSA; ECG          | Laboratory-based<br>measures; supine and<br>60° upright; NR |

Table S2. Continued.

| Study (author)                 | Group; exercise type (aerobic method)        | Intervention characteristics                                       |                                                                                                                                                                                                                                                                                                                                                           | HRV assessment characteristics                                     |                                                            |
|--------------------------------|----------------------------------------------|--------------------------------------------------------------------|-----------------------------------------------------------------------------------------------------------------------------------------------------------------------------------------------------------------------------------------------------------------------------------------------------------------------------------------------------------|--------------------------------------------------------------------|------------------------------------------------------------|
|                                |                                              | Setting; length; sessions a week                                   | Session details                                                                                                                                                                                                                                                                                                                                           | Study (author)                                                     | Group; exercise type (aerobic method)                      |
| Oliveira-Junior et al. [80]    | IG; CT (HIIT)<br><br>CG; NA                  | Supervised; 12 weeks; 2 sessions                                   | 5 min at 60–70% at HRmax in the cycle ergometer WU + 9 exercises in 3 mini-circuit stations / 55 s (60–70% HRmax), 5 s maximal sprint (no load), 30 s maximal sprint / 3 min cycle ergometer (no load; 50–70 rpm) + 5 min no load cycle ergometer / 9 min active stretching (1 rep x 45 s per position, including muscle trunk, upper and lower limbs) CD | RMSSD and HF (ms <sup>2</sup> ); FFT; HR monitor                   | Laboratory-based measures; supine and sitting; spontaneous |
| Boutcher and Stein [67]        | IG; AT (MIT)<br><br>CG; NA                   | Supervised; 8 weeks; 3 sessions                                    | 0.25-mile walking (with flexibility) WU + 20 min walking-jogging-cycling at 60% HRres / Progression: 20 min for the first 3 sessions, 25 min for the next 3 sessions, and 30 min from the 9th through to the 25th sessions + 0.25-mile walking (with flexibility) CD                                                                                      | HF (ms <sup>2</sup> ); NR; ECG                                     | Laboratory-based measures; seated; 7.5 breaths per min     |
| de Rezende Barbosa et al. [68] | IG; AT (MIT)<br>CG; NA                       | Supervised; 18 weeks; 3 sessions                                   | Circuit: 3 x 11 exercise stations (functional training x 30-70 s / 30 s recovery + walk 30 - 18 min                                                                                                                                                                                                                                                       | RMSSD, HF (ms <sup>2</sup> ) and SD <sub>1</sub> ; FFT; HR monitor | Laboratory-based measures; supine; spontaneous             |
| Hautala et al. [69]            | IG; AT (MIT)<br>CG; NA                       | Supervised; 2 weeks; 5 sessions                                    | 5 min WU (cycling 50-W and 75-W resistance for women and men, respectively) + 30 min cycling at 70 – 80% HRmax + 5 min (cycling 50-W and 75-W resistance for women and men, respectively) CD                                                                                                                                                              | HF (ms <sup>2</sup> ); AR; HR monitor                              | Nocturnal; laying; NA                                      |
| Heydari et al. [70]            | IG; AT (HIIT)<br>CG; NA                      | Supervised; 12 weeks; 3 sessions                                   | 5 min WU + 20 min of 8-s sprint and a 12-s recovery (workload 80 – 90% HRmax cadence 120 and 130 rpm / recovery cadence 40 rpm) + 5 min CD                                                                                                                                                                                                                | RMSSD and HF (ms <sup>2</sup> ); NR; HR monitor                    | Laboratory-based measures; supine; spontaneous             |
| Jelinek et al. [71] *          | IG; AT (MIT) HV<br>IG; AT (MIT) LV<br>CG; NA | Home-based; 8 weeks; 6 sessions<br>Home-based; 8 weeks; 6 sessions | 60 min at 70 – 80% HRmax walking and jogging.<br><br>30 min at 70 – 80% HRmax walking and jogging.                                                                                                                                                                                                                                                        | SD <sub>1</sub> ; NA; HR monitor                                   | Nocturnal; laying; NA                                      |

Table S2. Continued.

| Study<br>(author)           | Group;<br>exercise type<br>(aerobic<br>method) | Intervention characteristics        |                                                                                                                                                                                                                                                                                                                                                                                                                                                                                                                                                                                | HRV assessment characteristics                         |                                                      |
|-----------------------------|------------------------------------------------|-------------------------------------|--------------------------------------------------------------------------------------------------------------------------------------------------------------------------------------------------------------------------------------------------------------------------------------------------------------------------------------------------------------------------------------------------------------------------------------------------------------------------------------------------------------------------------------------------------------------------------|--------------------------------------------------------|------------------------------------------------------|
|                             |                                                | Setting; length;<br>sessions a week | Session details                                                                                                                                                                                                                                                                                                                                                                                                                                                                                                                                                                | HRV index; power<br>spectral density method;<br>device | Setting; assessment<br>position; breathing<br>rate   |
| Kanegusuku<br>et al. [72] * | IG;<br>RT (NA)                                 | Supervised; 16<br>weeks; 2 sessions | 7 exercise / Weeks 1–4: sets 2 and 10 rep / Weeks 5–8: sets 2 + 1 and<br>10 + 8 rep / Weeks 9–12: sets 3 and 8 rep / Weeks 13–14: sets 2 + 2<br>and 8 + 6 rep / Weeks 15–16: sets 2 + 2 and 6 + 4 rep /<br>3 min rest sets and exercises                                                                                                                                                                                                                                                                                                                                       | HF (nu); AR; ECG                                       | Laboratory-based<br>measures; seated; NR             |
|                             | CG; NA                                         |                                     |                                                                                                                                                                                                                                                                                                                                                                                                                                                                                                                                                                                |                                                        |                                                      |
| Karavirta et<br>al. [73]    | IG;<br>AT (MIT)                                | Supervised; 21<br>weeks; 2 sessions | 15 min WU + cycling training - first cycle 7 weeks (30 min below<br>aerobic threshold) / second cycle 7 weeks (one session 45 min, 10<br>min interval between aerobic-anaerobic thresholds and a 5 min<br>interval above anaerobic threshold - other session 60 min below<br>aerobic threshold) / last cycle 7 weeks (one session 60 min, two 10<br>min intervals between the aerobic-anaerobic thresholds, two 5 min<br>intervals above anaerobic threshold, and 30 min below aerobic<br>threshold - other session 90 min steady pace below aerobic<br>threshold) + 15 min CD | HF (ms <sup>2</sup> ); NR; HR monitor                  | Laboratory-based<br>measures; supine;<br>spontaneous |
|                             | IG;<br>RT (NA)                                 | Supervised; 21<br>weeks; 2 sessions | 7 – 10 exercises lower and upper body / first cycle 7 weeks (40–<br>60% of 1RM; 12–20 rep; 3 sets) / second cycle 7 weeks (60–80% of<br>1RM; 5–12 rep; 2–4 sets) / last cycle 7 weeks (70–85 of 1RM;<br>5–8 rep; 2–4 sets)                                                                                                                                                                                                                                                                                                                                                     |                                                        |                                                      |
|                             | IG;<br>CT (MIT)<br>CG; NA                      | Supervised; 21<br>weeks; 4 sessions | described in the preceding cells                                                                                                                                                                                                                                                                                                                                                                                                                                                                                                                                               |                                                        |                                                      |

Table S2. Continued.

| Study (author)           | Group;<br>exercise type<br>(aerobic<br>method) | Intervention characteristics        |                                                                                                                                                                                                                                                                                                                                                                                                                                                                                                                                                        | HRV assessment characteristics                                        |                                                                                                                 |
|--------------------------|------------------------------------------------|-------------------------------------|--------------------------------------------------------------------------------------------------------------------------------------------------------------------------------------------------------------------------------------------------------------------------------------------------------------------------------------------------------------------------------------------------------------------------------------------------------------------------------------------------------------------------------------------------------|-----------------------------------------------------------------------|-----------------------------------------------------------------------------------------------------------------|
|                          |                                                | Setting; length;<br>sessions a week | Session details                                                                                                                                                                                                                                                                                                                                                                                                                                                                                                                                        | HRV index; power<br>spectral density method;<br>device                | Setting; assessment<br>position; breathing<br>rate                                                              |
| Karavirta et al.<br>[74] | IG;<br>AT (MIT)                                | Supervised; 21<br>weeks; 2 sessions | 15 min WU + cycling training - first cycle 7 weeks (30 min below aerobic threshold) / second cycle 7 weeks (one session 45 min, 10 min interval between aerobic-anaerobic thresholds and a 5 min interval above anaerobic threshold - other session 60 min below aerobic threshold) / last cycle 7 weeks (one session 60 min, two 10 min intervals between the aerobic-anaerobic thresholds, two 5 min intervals above anaerobic threshold, and 30 min below aerobic threshold - other session 90 min steady pace below aerobic threshold) + 15 min CD | HF (ms <sup>2</sup> ); AR; HR monitor                                 | Laboratory-based<br>measures; supine;<br>spontaneous                                                            |
|                          | IG;<br>RT (NA)                                 | Supervised; 21<br>weeks; 2 sessions | 7 – 10 exercises lower and upper body / first cycle 7 weeks (40–60% of 1RM; 15–30 rep; 3 sets); second cycle 7 weeks (60–80% of 1RM; 6–12 rep per set); last cycle 7 weeks (70–85 of 1RM; 5–8 rep per set)                                                                                                                                                                                                                                                                                                                                             |                                                                       |                                                                                                                 |
|                          | IG;<br>CT (MIT)<br>CG; NA                      | Supervised; 21<br>weeks; 4 sessions | described in the preceding cells                                                                                                                                                                                                                                                                                                                                                                                                                                                                                                                       |                                                                       |                                                                                                                 |
| Kim et al. [75]<br>*     | IG;<br>AT (MIT) 1                              | Supervised; 8<br>weeks; 3 sessions  | 5 min WU + 30–50 min on a treadmill at 75% HR <sub>res</sub> + 5 min CD                                                                                                                                                                                                                                                                                                                                                                                                                                                                                | RMSSD, HF (ms <sup>2</sup> ) and SD <sub>1</sub> ;<br>FFT; HR monitor | Laboratory-based<br>measures; seated;<br>15 breaths per min                                                     |
|                          | IG;<br>AT (MIT) 2<br>CG; NA                    | Supervised; 8<br>weeks; 2 sessions  | 5 min WU + 30–50 min on a treadmill at 60% HR <sub>res</sub> + 5 min CD                                                                                                                                                                                                                                                                                                                                                                                                                                                                                |                                                                       |                                                                                                                 |
| Lee et al. [76] *        | IG;<br>AT (MIT)<br><br>CG; NA                  | Supervised; 2<br>weeks; 4 sessions  | 40 min cycling / 5 min WU (cycling no added resistance) + 30 min at 80–85% HR <sub>res</sub> + 5 min CD (cycling no added resistance)                                                                                                                                                                                                                                                                                                                                                                                                                  | HF (nu); FFT; ECG                                                     | Laboratory-based<br>measures; supine and<br>head-up tilt; 12 breaths<br>per min (controlled and<br>spontaneous) |

**Table S2.** Continued.

| Study<br>(author)                 | Group;<br>exercise type<br>(aerobic<br>method) | Intervention characteristics        |                                                                                                                                                                                                            | HRV assessment characteristics                                       |                                                      |
|-----------------------------------|------------------------------------------------|-------------------------------------|------------------------------------------------------------------------------------------------------------------------------------------------------------------------------------------------------------|----------------------------------------------------------------------|------------------------------------------------------|
|                                   |                                                | Setting; length;<br>sessions a week | Session details                                                                                                                                                                                            | HRV index; power<br>spectral density method;<br>device               | Setting; assessment<br>position; breathing<br>rate   |
| Rezende<br>Barbosa et<br>al. [81] | IG;<br>RT (NA)<br><br>CG; NA                   | Supervised; 12<br>weeks; 3 sessions | 30-40% 1RM (first 3 weeks), 4th week recuperation (untrained),<br>5th to 8th week ranged from 40-90% of 1RM, 9th week<br>recuperation (untrained) and 10th, 11th and 12th week ranged<br>from 80-100% 1RM. | RMSSD, HF (ms <sup>2</sup> ) and SD <sub>1</sub> ;<br>NR; HR monitor | Laboratory-based<br>measures; supine;<br>spontaneous |
| Romagnoli<br>et al. [82] *        | IG;<br>AT (MIT)<br>CG; NA                      | NR; 8 weeks;<br>3 sessions          | 60 min 65 to 80% HRmax theoretical                                                                                                                                                                         | HRV was not assessed<br>(NA)                                         | HRV was not assessed<br>(NA)                         |
| Rossi et al.<br>[83]              | IG;<br>CT (HIIT)<br>CG; NA                     | Supervised; 16<br>weeks; 3 sessions | 5 min WU + 50 min resistance training (9 exercises; 12 - 15 rep<br>1RM) / 30 min aerobic (anaerobic threshold, 70% HRmax) + 5<br>min CD                                                                    | RMSSD and HF (ms <sup>2</sup> ); FFT;<br>HR monitor                  | Laboratory-based<br>measures; supine;<br>spontaneous |
| Shen and<br>Wen [84]              | IG;<br>AT (MIT)<br><br>CG; NA                  | Supervised; 10<br>weeks; 3 sessions | 90 min per session / 10–15 min stretching WA + step aerobic<br>exercise: target HR first 5–10 min and held 35–40 min (75–85%<br>HRres) + 10-15min balance and CD + 10–15 stretching and<br>relaxation      | RMSSD and HF (nu); WD;<br>ECG                                        | Laboratory-based<br>measures; NR; NR                 |
| Shiotani et<br>al. [85]           | IG;<br>AT (MIT)<br>CG; NA                      | Supervised; 8<br>weeks; 3 sessions  | 35 min ergometer cycling at 60% HRres                                                                                                                                                                      | HF (ms <sup>2</sup> ); FFT; ECG                                      | Nocturnal; laying; NA                                |
| Sloan et al.<br>[86] *            | IG;<br>AT (MIT)<br>CG; NA                      | Supervised; 12<br>weeks; 4 sessions | 10-15 minutes WU + 30-40 minutes at 55-65% weeks 1-2 / 65-75%<br>weeks 3-4 / 80% HRmax remaining weeks + 10-15 min CD                                                                                      | RMSSD and HF (ms <sup>2</sup> ); FFT;<br>ECG                         | Laboratory-based<br>measures; NR; NR                 |



Table S2. Continued.

| Study<br>(author)        | Group;<br>exercise type<br>(aerobic<br>method) | Intervention characteristics             |                                                                                                                                                                                                                                                                                                                                                                                 | HRV assessment characteristics                         |                                                                   |
|--------------------------|------------------------------------------------|------------------------------------------|---------------------------------------------------------------------------------------------------------------------------------------------------------------------------------------------------------------------------------------------------------------------------------------------------------------------------------------------------------------------------------|--------------------------------------------------------|-------------------------------------------------------------------|
|                          |                                                | Setting; length;<br>sessions a week      | Session details                                                                                                                                                                                                                                                                                                                                                                 | HRV index; power<br>spectral density method;<br>device | Setting; assessment<br>position; breathing<br>rate                |
| Soltani et al.<br>[87]   | IG;<br>AT (MIT) HV                             | Supervised; 12<br>weeks; 3 sessions      | 45 min at 50% VO <sub>2</sub> max first 2 weeks / 50 min at 55% VO <sub>2</sub> max<br>followed 6 weeks (3–7) / 60 min at 60% VO <sub>2</sub> max final 5 weeks (8–<br>12)                                                                                                                                                                                                      | RMSSD and HF (ms <sup>2</sup> ); FFT;<br>HR monitor    | Laboratory-based<br>measures; supine;<br>spontaneous              |
|                          | IG;<br>AT (MIT) LV                             | Supervised; 12<br>weeks; 3 sessions      | 25 min at 70% VO <sub>2</sub> max first 2 weeks / 35 min at 80% VO <sub>2</sub> max<br>followed 6 weeks (3–7) / 40 min at 85% VO <sub>2</sub> max final 5 weeks (8–<br>12)                                                                                                                                                                                                      |                                                        |                                                                   |
|                          | CG; NA                                         |                                          |                                                                                                                                                                                                                                                                                                                                                                                 |                                                        |                                                                   |
| Songsorn et<br>al. [88]  | IG;<br>AT (HIIT)<br>CG; NA                     | Supervised; 6<br>weeks; 3 sessions       | 60 min 65 to 80% HRmax theoretical                                                                                                                                                                                                                                                                                                                                              | RMSSD and HF (ms <sup>2</sup> ); NR;<br>HR monitor     | Laboratory-based<br>measures; supine;<br>12 breaths per min       |
| Tulppo et al.<br>[89]    | IG;<br>AT (MIT) HV                             | NR; 8 weeks;<br>6 sessions               | 60 min at 70-80% HRmax walking and jogging                                                                                                                                                                                                                                                                                                                                      | HF (ms <sup>2</sup> ); AR; HR monitor                  | Nocturnal; laying; NA                                             |
|                          | IG;<br>AT (MIT) LV                             | NR; 8 weeks;<br>6 sessions               | 30 min at 70-80% HRmax walking and jogging                                                                                                                                                                                                                                                                                                                                      |                                                        |                                                                   |
|                          | CG; NA                                         |                                          |                                                                                                                                                                                                                                                                                                                                                                                 |                                                        |                                                                   |
| Verheyden<br>et al. [90] | IG;<br>CT (MIT)<br>CG; NA                      | Supervised; 48<br>weeks;<br>2.5 sessions | 75 min / first two sessions familiarizing, two exercise first bicycle<br>ergometry and then treadmill walking/jogging or rowing<br>ergometry at 65 increased gradually to 80% HRres (first 6 months,<br>increased 12 min in the first sessions to 15 min, which was<br>maintained rest year) / 7 exercises (upper and lower limbs) 2 sets<br>of 30 rep 30-RM increased to 20-RM | HF (ms <sup>2</sup> ); FFT; ECG                        | Laboratory-based<br>measures; supine and<br>standing; spontaneous |

AR, auto-regressive; AT, aerobic training; CD, cool-down; CGSA, coarse graining spectral analysis; CT, combined aerobic and resistance training; CG, non-exercise control group; ECG, electrocardiogram; FFT, fast-Fourier transform; HF, high frequency; HIIT, high-intensity interval training; HV, high volume; HR, heart rate; HRmax, maximal heart rate; HRres, heart rate reserve; HRV, heart rate variability; IG, intervention group; LV, low volume; MIT, moderate intensity training; ms<sup>2</sup>, milliseconds squared; NA, no applicable; NR, no reported; NU, normalised units; PHR, peak heart rate; 1RM, One-repetition maximum; RMSSD, the root-mean-square difference of successive normal R-R intervals; RPM, revolutions per minute; Rep, repetitions; RT, resistance training; Sc, stretching; SD<sub>1</sub>, the standard deviation of instantaneous beat-to-beat R-R interval variability; VO<sub>2</sub>max, maximal oxygen uptake; WD, wavelet decomposition; WU, warm-up;

§Other details are provided in the aerobic training group

\*Excluded from the quantitative synthesis

**Table S3.** Heart rate recovery assessment characteristics and outcomes reported.

| Study (author)          | Characteristics                                                     |                               | Reported outcomes |                      |
|-------------------------|---------------------------------------------------------------------|-------------------------------|-------------------|----------------------|
|                         | Test characteristics                                                | Recovery characteristics      | HRR index         | SMD (95% CI)         |
| Hautala et al. [69]     | Cycling; maximal incremental test until volitional exhaustion       | Passive; 1 min; seated        | HRR 1 min         | 0.31 (−0.12, 0.74)   |
| Mourot et al. [79]      | Cycling; submaximal constant test at 50% VO <sub>2</sub> max; 6 min | Passive; 2 min; NR (position) | T30               | −1.42 (−2.47, −0.37) |
|                         |                                                                     |                               | T120              | −2.61 (−4.03, −1.18) |
| Romagnoli et al. [82] * | Cycling; submaximal constant test at 65% HR max; 3 min              | Passive; 3 min; seated        | HRR 1 min         | 2.02 (1.04, 3.01)    |
|                         |                                                                     |                               | HRR 2 min         | 1.43 (0.58, 2.28)    |
|                         |                                                                     |                               | HRR 3 min         | 1.62 (0.73, 2.52)    |
|                         |                                                                     |                               | T30               | −0.82 (−1.57, −0.08) |
|                         |                                                                     |                               | T30 min           | −1.22 (−2.03, −0.41) |
|                         |                                                                     |                               | MEF A0            | −0.97 (−1.74, −0.20) |
|                         | Cycling; submaximal constant test at 80% HR max; 3 min              | Passive; 3 min; seated        | MEF Amax          | 2.52 (1.40, 3.65)    |
|                         |                                                                     |                               | HRR 1 min         | 1.02 (0.25, 1.80)    |
|                         |                                                                     |                               | HRR 2 min         | 1.58 (0.69, 2.46)    |
|                         |                                                                     |                               | HRR 3 min         | 2.05 (1.06, 3.05)    |
|                         |                                                                     |                               | T30               | −0.27 (−0.96, 0.43)  |
|                         |                                                                     |                               | T30 min           | −0.61 (−1.33, 0.11)  |
|                         |                                                                     |                               | MEF A0            | −0.89 (−1.65, −0.13) |
|                         |                                                                     |                               | MEF Amax          | 1.24 (0.42, 2.05)    |

HRR, heart rate recovery; HRR 1 min, number of heart beats recovered within 1 min after exercise; HRR 2 min, number of heart beats recovered within 2 min after exercise; HRR 3 min, number of heart beats recovered within 3 min after exercise; MEF A0, mono-exponential function predicted heart rate end 3-minute recovery period; MEF Amax, mono-exponential function recovered heart rate end 3-minute recovery period; SMD, standardised mean difference; T30, negative reciprocal of slope of regression line between natural logarithm of heart rate from first 30 s after exercise; T120, negative reciprocal of slope of regression line between natural logarithm of heart rate from first 120 s after exercise; T30 min, smallest time constant using negative reciprocal of slope of regression line between natural logarithm of heart rate from first 30 s after exercise;

**Table S4.** Methodological quality assessment of included studies judged using TESTEX scale.

| Study                          | Study quality |        |        |        |        |        | Study reporting |        |        |         |         |         | Overall | Judgement |
|--------------------------------|---------------|--------|--------|--------|--------|--------|-----------------|--------|--------|---------|---------|---------|---------|-----------|
|                                | Item 1        | Item 2 | Item 3 | Item 4 | Item 5 | Item 6 | Item 7          | Item 8 | Item 9 | Item 10 | Item 11 | Item 12 |         |           |
| Audette et al. [65] *          | 1             | 0      | 0      | 1      | 0      | 0      | 0               | 1      | 1      | 0       | 0       | 1       | 5       | Poor      |
| Boutcher et al. [66]           | 1             | 0      | 0      | 1      | 1      | 0      | 1               | 1      | 1      | 0       | 0       | 1       | 7       | Fair      |
| Lopes et al. [77]              | 1             | 0      | 0      | 1      | 1      | 0      | 1               | 1      | 1      | 0       | 1       | 1       | 8       | Fair      |
| Melanson and Freedson [78]     | 1             | 0      | 0      | 1      | 1      | 0      | 0               | 1      | 1      | 0       | 0       | 1       | 6       | Fair      |
| Mourot et al. [79]             | 1             | 0      | 0      | 1      | 1      | 0      | 1               | 0      | 1      | 0       | 0       | 1       | 6       | Fair      |
| Oliveira-Junior et al. [80]    | 1             | 0      | 0      | 1      | 1      | 0      | 0               | 1      | 1      | 0       | 0       | 1       | 6       | Fair      |
| Boutcher and Stein [67]        | 0             | 0      | 0      | 1      | 1      | 0      | 0               | 1      | 1      | 0       | 0       | 1       | 5       | Poor      |
| de Rezende Barbosa et al. [68] | 1             | 0      | 0      | 1      | 1      | 0      | 0               | 1      | 1      | 0       | 0       | 1       | 6       | Fair      |
| Hautala et al. [69]            | 1             | 0      | 0      | 1      | 1      | 1      | 0               | 1      | 1      | 0       | 1       | 1       | 8       | Fair      |
| Heydari et al. [70]            | 1             | 0      | 0      | 1      | 0      | 0      | 0               | 1      | 1      | 0       | 0       | 1       | 5       | Poor      |
| Jelinek et al. [71] *          | 1             | 0      | 0      | 0      | 1      | 0      | 0               | 1      | 1      | 0       | 0       | 1       | 5       | Poor      |
| Kanegusuku et al. [72] *       | 1             | 0      | 0      | 1      | 1      | 0      | 0               | 1      | 1      | 0       | 0       | 1       | 6       | Fair      |
| Karavirta et al. [73]          | 1             | 0      | 0      | 1      | 1      | 2      | 0               | 0      | 1      | 0       | 1       | 1       | 8       | Fair      |
| Karavirta et al. [74]          | 1             | 0      | 0      | 1      | 1      | 0      | 0               | 0      | 1      | 0       | 1       | 1       | 6       | Fair      |
| Kim et al. [75] *              | 1             | 0      | 0      | 1      | 1      | 0      | 0               | 1      | 1      | 0       | 0       | 1       | 6       | Fair      |
| Lee et al. [76] *              | 1             | 0      | 0      | 1      | 1      | 0      | 1               | 1      | 1      | 0       | 1       | 1       | 8       | Fair      |
| Rezende Barbosa et al. [81]    | 1             | 0      | 0      | 0      | 1      | 1      | 0               | 1      | 1      | 0       | 0       | 1       | 6       | Fair      |
| Romagnoli et al. [82] *        | 1             | 0      | 0      | 1      | 1      | 0      | 1               | 1      | 1      | 0       | 0       | 1       | 7       | Fair      |
| Rossi et al. [83]              | 1             | 0      | 0      | 1      | 1      | 0      | 0               | 0      | 1      | 0       | 1       | 1       | 6       | Fair      |
| Shen and Wen [84]              | 1             | 0      | 0      | 1      | 1      | 0      | 0               | 1      | 1      | 0       | 0       | 1       | 6       | Fair      |
| Shiotani et al. [85]           | 1             | 1      | 0      | 1      | 1      | 0      | 0               | 0      | 1      | 0       | 0       | 1       | 6       | Fair      |
| Sloan et al. [86] *            | 1             | 0      | 0      | 1      | 1      | 2      | 0               | 1      | 1      | 1       | 0       | 1       | 9       | Good      |
| Soltani et al. [87]            | 1             | 1      | 0      | 1      | 1      | 3      | 0               | 1      | 1      | 0       | 0       | 1       | 10      | Good      |
| Songsorn et al. [88]           | 1             | 1      | 1      | 1      | 1      | 3      | 0               | 1      | 1      | 0       | 0       | 1       | 11      | Good      |
| Tulppo et al. [89]             | 1             | 0      | 0      | 1      | 1      | 0      | 0               | 0      | 1      | 0       | 0       | 1       | 5       | Poor      |
| Verheyden et al. [90]          | 1             | 0      | 0      | 1      | 1      | 3      | 0               | 0      | 1      | 0       | 0       | 1       | 8       | Fair      |

Item 1, eligibility criteria specified; Item 2, randomisation specified; Item 3, allocation concealment; Item 4, group similar at baseline; Item 5, blinding of assessor for flow-mediated dilation; Item 6, outcome measures assessed in 85% of patients; Item 7, intention-to-treat analysis; Item 8, between-group statistical comparisons reported; Item 9, point measures and measures of variability for all reported outcome measures; Item 10, activity monitoring in control groups; Item 11, relative exercise intensity remained constant; Item 12, exercise volume and energy expenditure;

**Table S5.** Heterogeneity analyses for RMSSD.

| Categorical variables      |                     |    |                    | Test for subgroup differences |                |
|----------------------------|---------------------|----|--------------------|-------------------------------|----------------|
| Moderator                  | Category            | K  | SMD (95% CI)       | Chi <sup>2</sup>              | p <sup>a</sup> |
| Study design               | Randomised          | 8  | 0.60 (0.10, 1.10)  | 0.06                          | .812           |
|                            | Non-randomised      | 4  | 0.53 (0.15, 0.90)  |                               |                |
| Sex                        | Males               | 5  | 0.78 (0.33, 1.24)  | 1.61                          | .447           |
|                            | Females             | 5  | 0.45 (−0.21, 1.11) |                               |                |
|                            | Mixed sample        | 2  | 0.37 (−0.10, 0.85) |                               |                |
| Breathing control          | Yes                 | 3  | 0.63 (0.20, 1.06)  | 0.17                          | .677           |
|                            | No                  | 6  | 0.76 (0.34, 1.17)  |                               |                |
| Exercise type              | Aerobic training    | 8  | 0.55 (0.06, 1.04)  | 0.23                          | .893           |
|                            | Resistance training | 2  | 0.71 (0.25, 1.17)  |                               |                |
|                            | Combined training   | 2  | 0.62 (−0.24, 1.47) |                               |                |
| Aerobic training method *  | HIIT                | 5  | 0.47 (0.17, 0.77)  | 0.12                          | .730           |
|                            | MIT                 | 5  | 0.62 (−0.19, 1.43) |                               |                |
| Continuous variables       |                     |    |                    |                               |                |
| Moderator                  |                     | K  | B (95% CI)         | Z                             | p              |
| Intervention length, weeks |                     | 12 | 0.04 (−0.06, 0.15) | 0.85                          | .395           |
| Total number of sessions   |                     | 12 | 0.01 (−0.02, 0.05) | 0.92                          | .356           |

*B*, *B* regression coefficient; *Chi*<sup>2</sup>, chi-square statistic; CI, confidence interval; HIIT, high-intensity interval training; *I*<sup>2</sup>, heterogeneity index; K, number of analysis units; LVEF, left ventricular ejection fraction; MIT, moderate intensity training; *p*, probability level associated to the absolute value of *Z* statistic for *B* regression coefficient; *p*<sup>a</sup>, probability level associated to *chi-squared* statistic; SMD, standardised mean difference; *Z*, *Z* statistic for *B* regression coefficient;

**Table S6.** Heterogeneity analyses for HF.

| Categorical variables      |                     |    |                      | Test for subgroup differences |                |
|----------------------------|---------------------|----|----------------------|-------------------------------|----------------|
| Moderator                  | Category            | K  | SMD (95% CI)         | Chi <sup>2</sup>              | p <sup>a</sup> |
| Study design               | Randomised          | 19 | 0.18 (−0.09, 0.45)   | 2.37                          | .124           |
|                            | Non-randomised      | 4  | 0.53 (0.18, 0.88)    |                               |                |
| Sex                        | Males               | 11 | 0.22 (−0.25, 0.69)   | 0.24                          | .889           |
|                            | Females             | 7  | 0.18 (−0.12, 0.49)   |                               |                |
|                            | Mixed sample        | 5  | 0.28 (0.03, 0.53)    |                               |                |
| Breathing control          | Yes                 | 3  | 0.21 (−0.17, 0.58)   | 0.25                          | .615           |
|                            | No                  | 12 | 0.35 (−0.08, 0.79)   |                               |                |
| Exercise type              | Aerobic training    | 15 | 0.30 (0.12, 0.48)    | 0.84                          | .657           |
|                            | Resistance training | 3  | 0.26 (−0.27, 0.78)   |                               |                |
|                            | Combined training   | 5  | −0.12 (−1.02, 0.77)  |                               |                |
| Aerobic training method *  | HIIT                | 5  | 0.47 (0.17, 0.77)    | 1.93                          | .165           |
|                            | MIT                 | 15 | 0.15 (−0.18, 0.49)   |                               |                |
| Sessions a week            | > 3 sessions        | 5  | 0.12 (−0.16, 0.40)   | 0.50                          | .481           |
|                            | ≤ 3 sessions        | 18 | 0.27 (−0.03, 0.56)   |                               |                |
| Continuous variables       |                     |    |                      |                               |                |
| Moderator                  |                     | K  | B (95% CI)           | Z                             | p              |
| Intervention length, weeks |                     | 23 | −0.04 (−0.06, −0.02) | −3.89                         | <.001          |
| Total number of sessions   |                     | 23 | −0.01 (−0.02, −0.01) | −3.37                         | .001           |

*B*, *B* regression coefficient; *Chi*<sup>2</sup>, chi-square statistic; CI, confidence interval; HIIT, high-intensity interval training; *I*<sup>2</sup>, heterogeneity index; K, number of analysis units; LVEF, left ventricular ejection fraction; MIT, moderate intensity training; *p*, probability level associated to the absolute value of *Z* statistic for *B* regression coefficient; *p*<sup>a</sup>, probability level associated to *chi-squared* statistic; SMD, standardised mean difference; *Z*, *Z* statistic for *B* regression coefficient;
